1 **HIV Viral Non-Suppression and Its Associated Factors Among PMTCT Mothers Receiving**  
2 **ARV Treatment in Ethiopia.**

3 **Belete Woldesemayat<sup>1\*</sup>, Ajanaw Yizengaw<sup>1</sup>, Aschale Worku<sup>2</sup>, Amelework Yilma<sup>1</sup>, Sisay**  
4 **Adane<sup>1</sup>, Jaleta Bulti<sup>1</sup>, Eleni Kidane<sup>1</sup>, Gutema Bulti<sup>1</sup>, Saro Abdella<sup>1</sup>**

- 5  
6 1. HIV AIDS and TB directorate, Ethiopian Public Health Institute, Addis Ababa, Ethiopia  
7 2. Federal Ministry of Health, Addis Ababa, Ethiopia

8  
9 \*Corresponding author: [beletewoldesemeyat@gmail.com](mailto:beletewoldesemeyat@gmail.com), Ethiopian Public Health Institute, Arbegnoch  
10 Street, Addis Ababa, Ethiopia. PoBox: 1242.

11

12

13

14

15

16

17

18

19

20

## 21 **Abstract**

22 **Background:** Pediatric HIV infection is mainly caused by Mother-to-child transmission (MTCT).  
23 Without any effective medical intervention, 15-45% of infants born to HIV-positive women will  
24 become infected with HIV. The contribution of viral non-suppression for MTCT is high. Hence,  
25 this study was to determine the magnitude of HIV viral non-suppression, and associated factors  
26 among PMTCT Mothers in Ethiopia.

27 **Methods:** The study was conducted from April 1, 2023, to December 31/ 2024 at 16 public health  
28 facilities. An institutional-based cross-sectional study was employed and 496 HIV-positive  
29 pregnant and lactating women on ART were included. Data was collected using a prechecked  
30 questionnaire with paper mode and ODK (Open Data Kit) for each participant. Venous blood was  
31 collected using two Ethylenediamine Tetra acetic Acid (EDTA) tubes for HIV viral load, CD4 and  
32 Hgb test. HIV viral load tests were conducted at the EPHI (Ethiopian Public Health Institute)  
33 National HIV reference laboratory using the COBAS 4800 System (Roche Molecular  
34 Diagnostics). Data was edited and exported to SPSS from the ODK data file, and finally data  
35 analysis was performed using SPSS version 26 software.

36 **Results:** 496 PMTCT Mothers were included in this study, the prevalence of HIV viral non-  
37 suppression was 2.2% (95% CI; 1.1-3.9), the rate of viral detectability was 21.8 % (95% CI; 18.2-  
38 25.7) and the rate of low-level viremia (LLV) was 9.1%. Family size ( $X^2=7.20$ ;  $p<0.001$ ), a poor  
39 and fair level of Adherence ( $X^2=18.553$ ;  $p<0.001$ ), exposure to opportunistic infection ( $X^2=25.29$ ;  
40  $p<0.001$ ), survey time WHO clinical stages II & III ( $X^2=25.29$ ;  $p<0.001$ ), HIV status non-  
41 disclosure other than Health care workers (HCWs) ( $X^2=4.408$ ;  $p=0.036$ ), and low survey time CD4

42 count (<350 cells/ul) (  $X^2= 15.989$ ;  $p<0.001$ ) were significantly associated to the rate of HIV viral  
43 non-suppression.

44 **Conclusions:** In this study, HIV viral non-suppression among pregnant and lactating women is  
45 relatively low (meet the UNAIDS 2030 target). However, Family size, level of Adherence,  
46 exposure to opportunistic infection, WHO clinical stage level II and III, HIV status disclosure and  
47 low CD4 count were significantly associated with the prevalence of viral non-suppression. To  
48 achieve persistent HIV viral suppression enhanced adherence and counselling services should be  
49 provided, tailored to the needs of the specific target group.

50

51

52 **Keywords:** Associated factors, PMTCT, HIV viral non-suppression, Low-level viremia

## 53 **1. Introduction**

54 Mother-to-child transmission (MTCT) of HIV is the primary mode of HIV infection in children  
55 and paediatrics [1]. Without any effective medical intervention approximately 15–45% of  
56 infants born from HIV-positive women will become infected with HIV, out of these about 5-  
57 15% of them are got the infection with breastfeeding [2].

58 One of the biological risk factors of vertical transmission of HIV is related to the high maternal  
59 viral burden, which is a significant predictor of transmission especially when an HIV viral load  
60 of more than 1000 Ribonucleic Acid (RNA) copies per one millilitre of plasma [3-4]. In a  
61 collaborative prospective study from seven European countries and the United States, MTCT  
62 prevalence among anti-retroviral treated women with a viral RNA level of fewer than 1000  
63 copies at close to delivery was only one percent (95% CI; 0.4%–1.9%) [5].

64 HIV viral load (VL) has a central role in determining MTCT risk, in addition to this; viral  
65 lowering or suppression is strongly associated with decreased HIV disease progression, and  
66 prevention of sexual transmission. Even if there is a limitation on PMTCT service coverage in  
67 developing countries, viral suppression was registered after ART initiation in HIV-infected  
68 pregnant women, particularly in sub-Saharan Africa [6]. The year between 2009 and 2014,  
69 89% of infants were prevented with the provision of Anti-retroviral treatment (ART)  
70 medication for pregnant and breastfeeding women in 21 high-priority sub-Saharan countries  
71 [7].

72 HIV viral suppression is one of United Nations AIDS's (UNAIDS's) targets (95-95-95) to end  
73 AIDS epidemics by 2030. The third 95 indicate that at least 95% of those on ART should be  
74 virologically suppressed (<1000 RNA copies/ml), translating into a final target of at least 73%  
75 and 86% of all PLWH (people living with HIV) achieving virologic suppression [8-9]. It will

76 enable a profound decrease in AIDS-related deaths by 2025 and substantially reduce infection  
77 to near-zero levels by 2030 [10]. However, until now there are a lot of impediments, like  
78 attitude and behavioural problems towards ART medication, physiological change (e.g.  
79 pregnancy) and co-infection with infectious disease (e.g. Syphilis) to achieve the above  
80 attainments [11].

81 On the other hand, different studies showed that because of different factors virological non-  
82 suppression and drug resistance are more common in pregnant women than non-pregnant  
83 mothers [12-14]. According to the Ethiopian national HIV/AIDS strategic plan, the main way  
84 of MTCT is during breastfeeding, which 0.33% of infants were exposed because of the late  
85 start of ART during pregnancy, 3.83% of cases were due to dropped off ART from 14,000  
86 spectrum cases [15].

87 To achieve the optimal protection of MTCT of HIV, early identification (starting from the first  
88 antenatal care visit) and during the postnatal period of viral non-suppression during pregnancy  
89 and lactating period is very crucial. Many studies have reported on the HIV viral suppression  
90 rate and associated factors among non-PMTCT Mothers populations, however, the magnitude  
91 of HIV viral non-suppression in this study area and also limited study was reported in our  
92 country. Therefore, this study aims to assess the magnitude of viral non-suppression and its  
93 associated factors as programs aim for universal access among pregnant and lactating women  
94 whose viral load level was non-suppressed in Ethiopia.

95

## 96 **2. Materials and Methods**

### 97 **2.1. Study design and area**

98 An institutional-based cross-sectional study was conducted from April 1/ 2023 to December  
99 31/ 2023 in Addis Ababa, Ethiopia's capital city, located at 901'48"N 380 44'24"E/9.030000N  
100 98.740000E. According to the Central Statistical Authority of Ethiopia in 2021 population  
101 estimation, Addis Ababa has a total population of 3,774,000 people (1,782,000 male and  
102 1,992,000 female), with an annual growth rate of about 2.4%. The city is located in the  
103 country's heartland and is organized into 11 administrative sub-cities (Addis Ketema, Akaki  
104 Kality, Arada, Bole, Gullele, Kirkos, Kolfie Keranio, Lideta, Niyfas Silk-lafto, Yeka and Lemi-  
105 Kura). The health Bureau was in authority of the city's overall health activities. Numerous  
106 clinics, health centres, and hospitals offer medical services [16]. According to Ethiopian Health  
107 and Health Related Indicators, there were 78,106 anticipated pregnancies in Addis Ababa  
108 and 105,086 delivered by a trained attendant [17].

### 109 **2.1. Study population**

110 All HIV-positive pregnant and lactating mothers, who have been taking ART for at least 6  
111 months and were delivered or come to the health facility for Antenatal care (ANC) and or  
112 postnatal care (PNC) services in Sixteen (16) selected health institutions in Addis Ababa and  
113 given consent for data and sample collection were recruited in this study. Health facilities (HFs)  
114 included in this study have been selected purposively based on their PMTCT client load. We  
115 included 5 governmental hospitals, 10 health centres and 01 non-governmental health centre.  
116 At the end of the 2022/23 budget year, the total number of PMTCT clients in Addis Ababa was  
117 1041. A total of 16 health facilities were included in this study. Sample size determination was  
118 estimated based on a single population proportion by considering different assumptions  
119 including, the previous study conducted in West Shewa, Ethiopia, the proportion of viral non-

120 suppression was 11.3% [18] design effect 3, 95% confidence limit and 10% non-respondent  
121 rate were considered. The final sample size was 510, and the data were collected from 496  
122 participants in the study period.

## 123 **2.2. Data Collection**

124 Data was collected from 496 study participants by trained health professionals (1 laboratory  
125 personnel and 1 nurse/health officer) from ANC and PNC clinics in the selected health  
126 facilities. Additional training was given for data collectors on data collection using ODK,  
127 laboratory sample collection, sample handling, and storage. Pre-checked questionnaires were  
128 filled properly with ODK and paper forms. Sociodemographic (Age, Marital status, Education,  
129 Employment status, Family size), clinical and behavioural determinants (Disclosure,  
130 Adherence, WHO clinical stage, ART duration, ART regimen, CD4 count, HIV disclosure,  
131 Use of memory aids, Use of alternative medicine, Use of alcohol and Substance abuse) and  
132 Pregnancy-related variables (Gestational age, Parity, Anemic condition) variables were  
133 collected properly. All CD4, Haemoglobin and Syphilis tests were performed during the survey  
134 time by the previously existing referral system or in their facility laboratory. After the tests  
135 were performed the result was entered and sent by ODK.

136 Ten (10) millilitre venous blood was collected by using two Ethylene diamine Tetra acetic acid  
137 (EDTA) tubes and the plasma sample was separated and prepared immediately within 6 hours  
138 of after sample collection according to sample collection and transportation guidelines and  
139 stored 2-8 °C. All plasma samples were transported to the EPHI HIV national reference  
140 laboratory within 5 days for HIV viral load testing. If the sample was not tested within 5 days  
141 after collection, it was stored at -70 °C. Socio-demographic, clinical and other questionnaire-  
142 based information was collected by trained nurses or health officers and sample collection,

143 preparation and storage was done by laboratory personnel. A supervisor does daily supervision  
144 and sample transportation delegated from EPHI.

## 145 **2.3. Laboratory methods**

### 146 **HIV viral load**

147 Viral load testing was conducted at EPHI National HIV Reference Laboratory (NRHIVL)  
148 using the Cobas 4800 system (Roche Molecular Diagnostics, Pleasanton CA, USA, 2016  
149 Roche Molecular Systems, Inc.). In clinical specimens, the COBAS Real-Time HIV-1  
150 Quantitative RT-PCR creates the amplified product from the HIV-1 RNA genome, in the  
151 process of sample extraction the Cobas 4800 system uses QS (Quantification Standard), an  
152 RNA sequence unrelated to the HIV-1 target sequence is added to each specimen. This  
153 unrelated RNA sequence is amplified simultaneously with the target sequence by Real-time  
154 polymerase chain reaction (RT-PCR) to ensure the sample preparation and amplification  
155 procedures are working properly. Using fluorescent-labelled oligonucleotide probes, the  
156 COBAS 4800 system analyzes the quantity of HIV-1 target sequence present during each  
157 amplification cycle. The probes do not create a signal until they are directly connected to the  
158 amplified product. The amplification cycle at which the 4800z detects fluorescence light is  
159 proportional to the amount of HIV-1 RNA contained in the original sample. The COBAS 4800  
160 RT system measures the quantity of HIV-1 target sequence present at each amplification cycle  
161 using fluorescent-labeled oligonucleotide probes. The fluorescent signal recorded by the PCR  
162 machine is proportional to the copies of the HIV-1 RNA concentration in the original sample  
163 during the amplification cycle. We used a 0.4 millilitre (ml) sample volume, the lower detection  
164 limit is 20 RNA copies per one ml of plasma [19].



## 165 **2.4. Operational definition**

166 **PMTCT Mothers:** Pregnant and lactating women who were taking ARV treatment in the  
167 PMTCT clinics

168 **Viral non-suppression:**  $\geq 1000$  RNA copies/ml after ART treatment in the plasma sample

169 **Viral Detectability:** Viral load result  $\geq 20$  RNA copies/ml in the COBAS 4800 system

170 **Low-level viremia:** Viral load 50 to 999 RNA copies/ml

171 **Good Adherence:** Participants take medications at prescribed times and frequencies, and  
172 follow restrictions regarding food and other medications at least 95%.

173 **Poor Adherence:** participants take medications at prescribed times and frequencies, and  
174 follow restrictions regarding food and other medications less than 95%.

## 175 **2.5. Data processing and analysis**

176 Data was edited and entered into the computer using SPSS software version 26. The summary  
177 of descriptive statistics for all dependent and independent variables was done with cross-  
178 tabulation and Chi-square analysis. The association between quantitative variables associated  
179 with the viral un-suppression was performed using Non-parametric Mann-Whitney U analysis,  
180 P values were done and  $P < 0.05$  was considered a significant association.

## 181 **2.6. Ethical Approval**

182 Ethical clearance was obtained from the Ethiopian Public Health Institute Scientific Ethical  
183 Review Board with the protocol number EPHI-IRB-436-2022. Written informed consent was  
184 taken from each study participant. The responders' personal information was kept private and  
185 confidential except for the authors.

186

## 187 **3. Results**

### 188 **3.1. Socio-demographic characteristics of HIV positive Pregnant and** 189 **Lactating women**

190 In this study 496 participants were included from 16 health facilities; which comprised 5  
191 hospitals, 10 governmental health centres and one non-governmental health centre. The total  
192 response rate was 97.3%. Out of 496 participants, 265 (53.4%) were below the age of 30 years,  
193 and the mean age of participants was 30.96  $\pm$ 5.24 (Standard deviation). 153 (30.8%) of  
194 participant's educational status was primary school, 81 (16.3%) had no formal education and  
195 74 (14.9%) of participants' educational status was college or university. The majority of  
196 participants, 427 (86.1%) were Married, 384 (77.4%) were Orthodox Christians, 273 (55%)  
197 were housewives and many participants, 285 (57.5%) had family sizes were 3-4 (**Table 1**).

### 198 **3.2. Clinical and Behavioral Characteristics of Study Participants**

199 Among 496 participants 138 (27.8%) had discordant HIV results, whereas almost half of the  
200 participants 244 (49.2%) had the same result (HIV-positive) with their partners. The majority,  
201 455 (91.7%) of participants received regular ART supplies for the last 6 months. Similarly, 465  
202 (93.8%), 461 (92.9%), and 443 (89.3%) participants had good adherence, WHO clinical stage  
203 I and had not used any alcohol or other substance for the last month respectively. Out of 496  
204 subjects, 304 (61.3%) had a habit of using memory aid to take ART medicine. On the other  
205 hand, among 356 participants who were receiving previous ART regimens the majority, 320  
206 (89.9%) were receiving TDF + 3TC + EFV (**Table 2**).

207

208 In this study for the last 6 months 211 (42.5%) of participants were skipping/stopping ARV  
209 medication once or more than once. Out of these 211 participants, 82 (16.5%) skipped/stopped  
210 their medication due to they forgot/busy. Similarly, 0.8%, 3.6%, 0.4 %, and 2% skipped/missed

211 their medication because of taking herbal medicines, hospital admission and faith healing  
212 respectively (**Figure 1**). According to Figure 2, 455 (91.7%) participants received the new  
213 DTG-based ART regimen (TDF, 3TC, DTG). Whereas, 17 (3.4%), 8 (1.6%) and 7 (1.4%)  
214 participants were taking ART drugs including, TDF + 3TC + ATV/r, ABC+ 3TC + LPV/r, and  
215 TDF + 3TC + EFV respectively. 32 (6.5%) of ART patients were receiving a second-line  
216 regimen and the rest 464 (93.5%) were taking a first-line treatment regimen (**Figure 2**).

217  
218 According to the obstetrics characteristics of study participants, 320 (64.5%) were lactating  
219 women and the rest 176 (35.5%) were HIV-positive pregnant women. Among pregnant  
220 women, 11 (6.3%) were in the first trimester and 84 (47.7%) were in the third trimester. 194  
221 (39.1%) of participants had their pregnancy for the first time (primigravida). The majority of  
222 participants had 0-1 child (73%), did not have any types of chronic illness (98.2%), had good  
223 MUAC measurement (95.4%),  $\geq 350$  CD4 cells/ul (93.3%) and a negative syphilis antibody  
224 test (97.2%) (**Table 3**).

### 225 **3.3. Prevalence of HIV-1 viral non-suppression, viral undetectability and** 226 **low-level viremia**

227 Among 496 HIV-infected pregnant and lactating women who are receiving ART, 11 (2.2%;  
228 95% CI; 1.1 – 3.9) had virologically not suppressed (HIV VL $\geq$ 1000 copies/ml). The remaining  
229 485 (97.8% ) study participants had successfully suppressed viral load (**Figure 3A**). In this  
230 study, the magnitude of viral undetectability was 21.8 % (95% CI; 18.2-25.7) (**Figure 3B**). All  
231 participants taking first-line or second-line ARV treatment during the survey time were  
232 included. The low-level viremia (LLV) (50-999 RNA copies/ml) magnitude of this study was  
233 9.1% (45/496). Participants whose viral load was from 20-50 RNA copies/ml were 52 (10.5%)  
234 (**Figure 4**).

### 235 **3.4. Associated factors of HIV-1 viral non-suppression**

236 To determine the associated risk factors of HIV-1 viral non-suppression among pregnant and  
237 lactating women who were receiving option B+ in the PMTC department in Addis Ababa  
238 Health facilities. Socio-demographic, clinical, behavioural, nutritional, obstetric, and  
239 immunological determinants were included. To determine the socio-demographic risk factors  
240 for the viral non-suppression group among the participants, except family size, all independent  
241 variables including; age, marital status, type of health facility, educational status, religious view  
242 and occupational status were not significantly associated with non-viral suppression.  
243 Regarding family size the proportion of HIV-1 viral non-suppression was high who had a high  
244 family size (>4) and according to chi-square analysis the family size is significantly associated  
245 with non-viral suppression ( $X^2=7.20$ ;  $P=0.027$ ).

246 Regarding clinical and behavioural risk factors, participants who had poor adherence and fair  
247 adherence were found high proportion of viral non-suppression, poor 1(9.1%) Fair 3(15.0 %),  
248 the chi-square analysis showed that Adherence was significantly associated with viral non-  
249 suppression ( $X^2=18.553$ ;  $p<0.001$ ). Opportunistic infections during the survey time were  
250 significantly associated with viral non-suppression ( $X^2=25.290$ ;  $P<0.001$ ). WHO clinical stage  
251 II and III had a high proportion of viral non-suppression (14.3%) compared to WHO clinical  
252 stage I (1.3%), the chi-square test also showed that significantly associated with viral non-  
253 suppression ( $X^2=25.29$ ;  $P<0.001$ ). Similarly, participants who didn't disclose their HIV status  
254 other than HCWs were one of the associated factors for HIV-1 viral non-suppression ( $X^2=$   
255  $4.408$ ;  $P=0.036$ ).

256 The rate of viral non-suppression in patients whose CD4 count was less than 350 cells/ul was  
257 12.1%, whereas the rate of viral non-suppression among those whose CD4 count  $\geq 350$  cells/ul  
258 in the survey time was 1.5%. Therefore the chi-square analysis showed that CD4 count is  
259 significantly associated with HIV-1 viral non-suppression ( $X^2=15.989$ ;  $P<0.001$ ) (**Table 4**).

260 According to Figure 5, 211 (42.5%) participants skipped/missed their ARV medications at least  
261 once in the last 6 months. 6 (3%) of those HIV-1 viral loads were  $\geq 1000$  RNA copies/ml, while  
262 the rest of the viral suppression among these patients was 97% (n=205). Being forgotten/busy,  
263 running out of pills, depression, food shortage, and feeling better have had some associations  
264 with the rate of viral non-suppression. However, based on logistic regression analysis the  
265 associations were not reached at the significant level ( $p > 0.05$ ) (**Figure 5**).

266 According to independent T-test analysis, except for CD4 T cells, all the other parameters  
267 (Hgb, MUAC, Age and duration on ART) were not statistically significant association with  
268 HIV-1 viral non-suppression. The mean value of CD4 T cell count in the viral non-suppression  
269 group was 427 cells/ul and in the suppressed group was 557.85 cells/ul which indicated that  
270 the non-suppressed group CD4 is significantly lower compared to the suppressed group  
271 ( $P = 0.013$ ) (**Figure 6**). Similarly, the non-parametric Mann-Whitney U analysis showed that  
272 only CD4 T cells are significantly associated with HIV-1 Viral non-suppression (**Table 5**).

273

274

275

276

277

278

279

## 280 **4. Discussion**

281 HIV viral non-suppression is a key factor for HIV transmission through vertically or  
282 horizontally. The risk of transmission is null to very low if the HIV viral suppression is  
283 successful for people who are taking ARV medication. So, to create an AIDS-free generation  
284 monitoring viral suppression, enhanced Adherence and counselling in ART drugs, early case  
285 detections are the main issues in HIV/AIDS control and prevention programs. Moreover, in  
286 HIV-infected women who are taking ARV treatment and could maintain their HIV-1 viral load  
287 <1000 RNA copies/ml in pregnancy, delivery and breastfeeding, the mother-to-child HIV  
288 transmission could be very low (<1%). Similarly, if their viral load is maintained undetectable  
289 throughout their PMTCT period the vertical transmission is almost zero [20]. Our study  
290 evaluated the magnitude of HIV-1 Viral non-suppression and associated factors among HIV-  
291 positive pregnant and lactating women who are taking ARV treatment for at least six months.

292 In this study, the prevalence of HIV-1 viral non-suppression was 2.2 % (95% CI; 1.1-3.9), viral  
293 detectability was 21.8 % (95% CI; 18.2-25.7) and the magnitude of low-level viremia (LLV)  
294 (50-999 RNA copies/ml) was 9.1%. This result is in line with the study conducted in Northern  
295 Ethiopia, where the rate of viral non-suppression among pregnant women was 1.31% [21], and  
296 a study reported from South Africa, showed that viral non-suppression among women on ART  
297 was 4.1% [21]. Similarly, in another study from Northeastern South Africa, the rate of low-  
298 level viremia was quite similar to our study (13.8%) [23]. Also, the prevalence of detectable  
299 viral load was reported as 17.3 % in Malawi [24]. On the contrary, many previous studies  
300 showed that the prevalence of viral non-suppression among pregnant and lactating women was  
301 high including in, the Amhara region, Ethiopia (9.1%) [25], Rural South Africa (14.7%) [23],  
302 Rural Uganda (19%) [26], Southern and Central Malawi (16%) [27], Mazowe, Zimbabwe  
303 (5.6%) [28], Malawi (13.5%) [29], and 12.1% study from Kenya [30]. Our study showed that

304 the prevalence of HIV-1 viral non-suppression is comparatively low, it may mainly be related  
305 to the follow-up of PMTCT women increased due to their obstetrics conditions and access to  
306 PMTCT service expansion. Additionally, other differences including; type of population,  
307 adherence level of the population, geographical and cultural differences and some studies that  
308 include ART naïve participants might be the reason for high viral non-suppression. Viral load  
309 monitoring programs in the country among PMTCT clients may have a huge impact on viral  
310 load suppression, the local health system and program focus could affect the suppression rate  
311 [31]. Even though, the prevalence of low viral non-suppression was recorded, it had a critical  
312 impact on the program as well as for the offspring since HIV transmission is very high, the  
313 recent cohort study result also showed that the risk of HIV transmission was nine times more  
314 likely to transmit to the baby if the viral load result is non-suppressed in the time of pregnancy  
315 or breastfeeding [32].

316 Pregnant and lactating mothers whose HIV viral non-suppression was significantly associated  
317 with the level of Adherence, presence of opportunistic infection, HIV status disclosure status,  
318 family size and CD4 count. These results are supported by many studies which were performed  
319 in Ethiopia as well as in different regions of the world. In this study, poor level of adherence  
320 and fair level of adherence showed a high proportion of non-viral suppression (14.8%;  
321  $X^2=18.55$ ;  $P= <0.001$ ), a significantly high proportion of non-viral suppression among poor  
322 adherence also reported from Amhara region, Ethiopia [25] and Kenya [30]. Exposure to  
323 opportunistic infection was one of the associated factors for HIV viral non-suppression in this  
324 study, which is in line with the results reported from Uganda [33] and Ethiopia [34], even  
325 though both studies were performed on all Adult HIV patients who were taking ART.

326 The other important factor which is associated with viral non-suppression is the disclosure  
327 status of HIV other than health care workers, the proportion of non-disclosure groups is  
328 significantly high (4.5%;  $X^2=4.41$ ;  $p=0.036$ ) compared to participants who disclosed those HIV

329 positivity statuses, this result was concordant with the study conducted in Uganda [26] and  
330 Kenya [30]. On the other hand, some studies indicated that disclosure status was not  
331 significantly associated with the prevalence of non-viral suppression [23, 35]. This difference  
332 might be related to cultural differences of the study population, for example, our study  
333 population had little or no habit of disclosing their result other than health care workers due to  
334 fright of discrimination. It leads to they might not taking their ARV medication to hide  
335 themselves from others. In a similar context, this study also revealed that the high numbers of  
336 family size (>4 people in the family) was significantly associated (high proportion of viral non-  
337 suppression among these women) with viral non-suppression (4.5%;  $X^2 = 7.20$ ;  $p < 0.001$ ). The  
338 reason for this association might be related to the nutritional status of participants, even if this  
339 study showed that the MUAC measurement association did not reach the significant level with  
340 the viral non-suppression. In low-income countries high family size is significantly association  
341 with poverty and malnutrition [36].

342 In this study, CD4 count <350 cells/ul in the survey time was significantly associated with the  
343 HIV viral non-suppression (12.1 %,  $X^2 = 15.989$ ;  $p < 0.001$ ) and the Non-parametric Mann-  
344 Whitney U analysis also showed that the viral non-suppression was significantly associated  
345 with low CD4 count ( $p = 0.013$ ). This result was concordant with the study in Northern Ethiopia,  
346 specifically CD4 count in survey time (< 200 cells/ul) was significantly associated with viral  
347 non-suppression [21]. On the other hand, the result reported in Uganda that baseline CD4 count  
348 was not associated with non-viral suppression [37]. The difference is related to the time of CD4  
349 cell count because after ART treatment CD4 count could be reversed.

350 In our study the other factor associated with HIV viral non-suppression was the WHO clinical  
351 stage of participants in survey time, the result showed that participants in clinical stage II and  
352 Stage III had a statistically significant association with viral non-suppression. 14.3% of  
353 participants who were in WHO clinical stages II and III were virally non-suppressed ( $\geq 1000$



354 RNA copies/ml) ( $X^2= 25.29$ ;  $p<0.001$ ). In this study, there were no WHO clinical stage IV  
355 participants. This result is supported by the study conducted in Ethiopia [25]. According to  
356 different studies throughout the World HIV/AIDS disease progression, HIV viral replication  
357 and immune suppression (low CD4 count) had closely related outcomes [27, 38]. This study  
358 has some limitations including; Since it was an institution-based study we might not have  
359 included persons who had poor adherence to ARV drugs due to they had not any follow-up in  
360 the data collection period.

## 361 **5. Conclusion**

362 This study revealed that the prevalence of HIV viral non-suppression among pregnant and  
363 lactating women is relatively low and it showed that meeting the UNAIDS 2030 target. This  
364 performance might be related to the HIV prevention and control program implementation,  
365 specifically the PMTCT service improvement from time to time in pregnant and lactating  
366 women to prevent HIV transmission risks to their children. However, in this study Family size,  
367 level of Adherence, exposure to opportunistic infection, WHO clinical stage level II and III,  
368 HIV status disclosure and low CD4 value were significantly associated with the prevalence of  
369 viral non-suppression. Even though the prevalence rate was low, enhanced Adherence and  
370 counselling should be increased for specific groups of pregnant and lactating women like;  
371 women who have large family sizes and do not disclose their HIV status to immediate family  
372 members to achieve persistent HIV viral suppression.

## 373 **Acknowledgements**

374 Our acknowledgement is forwarded to all staff of the Ethiopian Public Health Institute, the  
375 national HIV reference laboratory for valuable support for sample handling and laboratory  
376 analysis.

## 377 **Funding**

378 This research received no specific grant from any funding institutions.

## 379 **Author Contributions**

380 **Conceptualization:** Belete Woldesemayat

381 **Data curation:** Belete Woldesemayat, Ajanaw Yizengaw

382 **Formal analysis:** Belete Woldesemayat, Ajanaw Yizengaw

383 **Investigation:** Amelework Yilma, Sisay Adane, Eleni Kidane

384 **Methodology:** Amelework Yilma, Sisay Adane, Gutema Bulti

385 **Resources:** Jaleta Bulti, Saro Abdella

386 **Supervision:** Belete Woldesemayat

387 **Validation:** Saro Abdella

388 **Visualization:** Belete Woldesemayat, Ajanaw Yizengaw

389 **Writing – original draft:** Belete Woldesemayat, Aschale Worku

390 **Writing–review & editing:** Belete Woldesemayat, Ajanaw Yizengaw, Aschale Worku,  
391 Amelework Yilma, Sisay Adane, Eleni Kidane, Gutema Bulti, Jaleta Bulti, Saro Abdella,. All  
392 authors have read and agreed to the published version of the manuscript.

393

394

395

396

397

## 398 Reference

- 399 1. Bucagu M, Bizimana J de D, Muganda J, Humblet CP. Socio-economic, clinical and  
400 biological risk factors for mother - to – child transmission of HIV-1 in Muhima health  
401 centre (Rwanda): a prospective cohort study. Arch Public Heal. 2013;71(4):1–12.
- 402 2. World Health Organization. Global guidance on criteria and processes for validation:  
403 elimination of mother-to-child transmission of HIV and syphilis. World Health  
404 Organization; 2017.
- 405 3. Plaeger S, Bermudez S, Mikiyas Y, Harawa N, Dickover R, Mark D, et al. Decreased  
406 CD8 Cell-Mediated Viral Suppression and Other Immunologic Characteristics of  
407 Women Who Transmit Human Immunodeficiency Virus to Their Infants. J Infect Dis.  
408 1999;179(6):1388–94.
- 409 4. Fischetti L, Danso K, Dompok A, Addo V, Haaheim L, Allain JP. Vertical  
410 transmission of HIV in Ghanaian women diagnosed in cord blood and post-natal  
411 samples. J Med Virol. 2005;77(3):351–9.
- 412 5. Ioannidis JP, Abrams EJ, Ammann A, Bulterys M, Goedert JJ, Gray L, et al.  
413 Perinatal Transmission of Human Immunodeficiency Virus Type 1 by Pregnant  
414 Women with RNA Virus Loads <1000 Copies/mL. J Infect Dis. 2001;183(4):539–45.
- 415 6. Myer L, Phillips T, Ramjith J, Bekker LG, McIntyre JA, Abrams EJ. Viral suppression  
416 after antiretroviral therapy initiation in pregnancy in South Africa. In Abstract  
417 presented at the Conference on Retroviruses and Opportunistic Infections 2015 (pp. 23-  
418 26).
- 419 7. UNAIDS M. Progress report on the global plan. Towards the elimination of new HIV  
420 infections among children by. 2015. Available from:  
421 [http://www.unaids.org/sites/default/files/media\\_asset/JC2774\\_2015ProgressReport\\_G](http://www.unaids.org/sites/default/files/media_asset/JC2774_2015ProgressReport_GlobalPlan_en.pdf)  
422 [lobalPlan\\_en.pdf](http://www.unaids.org/sites/default/files/media_asset/JC2774_2015ProgressReport_GlobalPlan_en.pdf)

- 423 8. Lima VD, St-Jean M, Rozada I, Shoveller JA, Nosyk B, Hogg RS, et al. Progress  
424 towards the United Nations 90-90-90 and 95-95-95 targets: The experience in British  
425 Columbia, Canada. *J Int AIDS Soc.* 2017;20(3):1–9.
- 426 9. World Health Organization. Global action plan on HIV drug resistance 2017-2021:  
427 2018 progress report, July 2018: executive summary. World Health Organization;  
428 2018.
- 429 10. Dunaway K, Brion S, Hale F, Alesi J, Assan H, Chung C, et al. What will it take to  
430 achieve the sexual and reproductive health and rights of women living with HIV?  
431 *Women’s Heal.* 2022;18. <https://doi.org/10.1177/1745505722108036>.
- 432 11. Petty LA, Steinbeck JL, Pursell K, Jensen DM. Human immunodeficiency virus and  
433 coinfection with hepatitis B and C. *Infect Dis Clin North Am.* 2014 Sep;28(3):477-99.  
434 doi: 10.1016/j.idc.2014.05.005. PMID: 25151567.
- 435 12. Kingoo JM. HIV Treatment Failure Markers; Virologic Outcomes after 12 Months of  
436 Antiretroviral Therapy among Patients Receiving HAART in Busia County, Kenya  
437 (Doctoral dissertation, JKUAT-COPAS).
- 438 13. Read JS, Cohen RA, Hance LF, MacHado ES, Mussi-Pinhata MM, Ceriotto M, et al.  
439 Missed opportunities for prevention of mother-to-child transmission of HIV-1 in the  
440 NISDI Perinatal and LILAC cohorts. *Int J Gynecol Obstet.* 2012;119(1):70–5.
- 441 14. Bulage L, Ssewanyana I, Nankabirwa V, Nsubuga F, Kihembo C, Pande G, et al.  
442 Factors Associated with Virological Non-suppression among HIV-Positive Patients on  
443 Antiretroviral Therapy in Uganda, August 2014-July 2015. *BMC Infect Dis.*  
444 2017;17(1):1–11.
- 445 15. (FHAPCO) FH prevention and control office. HIV/AIDS National Strategic Plan (NSP)  
446 for Ethiopia 2021-2025. 2021.

- 447 16. CSA. Population Size of Towns by Sex, Region, Zone and Weredas as of July 2021.  
448 Cent Stat Auth Ethiop. 2021.
- 449 17. Ethiopian Public Health Institute (EPHI) [Ethiopia]. Mini Demographic and Health  
450 Survey: key indicators [Internet]. Handbook of Federal Countries, 2005. 2019. 136–  
451 148 p. Available from: [www.DHSprogram.com](http://www.DHSprogram.com).
- 452 18. Demissie DB, Bulto GA, Mekuria WT, Dufera FN, Gamshe EN. Evaluation of  
453 antiretroviral therapy initiated among pregnant women under option B+ by viral load  
454 and CD4 count outcomes in selected hospitals of West Shewa Zone, Oromia Region,  
455 Ethiopia. HIV/AIDS-Research and Palliative Care. 2020 Mar 19:127-34.
- 456 19. World Health Organization. WHO Prequalification of In Vitro Diagnostics Public  
457 Report Product: cobas HIV-1 Quantitative nucleic acid test for use on the cobas 4800  
458 System. 2021. 1–65 p.
- 459 20. World Health Organization policy brief. The role of HIV viral suppression in improving  
460 individual health and reducing transmission: policy brief. Geneva: World Health  
461 Organization; 2023. Who. 2023;(ISBN 978-92-4-005517-9 (electronic version)):16.
- 462 21. Desta AA, Woldearegay TW, Futwi N, Gebrehiwot GT, Gebru GG, Berhe AA, et al.  
463 HIV virological non-suppression and factors associated with non-suppression among  
464 adolescents and adults on antiretroviral therapy in northern Ethiopia: A retrospective  
465 study. BMC Infect Dis. 2020;20(4):<https://doi.org/10.1186/s12879-019-4732-6>.
- 466 22. Ntombela NP, Kharsany AB, Soogun A, Yende-Zuma N, Baxter C, Kohler HP,  
467 McKinnon LR. Viral suppression among pregnant adolescents and women living with  
468 HIV in rural KwaZulu-Natal, South Africa: A cross-sectional study to assess progress  
469 towards UNAIDS indicators and Implications for HIV Epidemic Control. Reproductive  
470 Health. 2022;19(1):116.

- 471 23. Ngandu NK, Lombard CJ, Mbira TE, Puren A, Waitt C, Prendergast AJ, et al. HIV viral  
472 load non-suppression and associated factors among pregnant and postpartum women in  
473 rural northeastern South Africa: A cross-sectional survey. *BMJ Open*. 2022;12(3):1–  
474 12.
- 475 24. Chagomerana MB, Miller WC, Tang JH, Hoffman IF, Harrington BJ, DiPrete B, Wallie  
476 S, Jumbe A, Limarzi L, Hosseinipour MC. Prevalence of antiretroviral therapy  
477 treatment failure among HIV-infected pregnant women at first antenatal care: PMTCT  
478 Option B+ in Malawi. *PLoS One*. 2018;13(12):e0209052.
- 479 25. Endalamaw Alamneh D, Shiferaw MB, Demissie MG, Emiru MA, Kassie TZ, Lakew  
480 KE, et al. Virological Outcomes Among Pregnant Women Receiving Antiretroviral  
481 Treatment in the Amhara Region, North West Ethiopia. *HIV/AIDS - Res Palliat Care*.  
482 2023;15:209–16.
- 483 26. Koss CA, Natureeba P, Kwarisiima D, Ogena M, Clark TD, Olwoch P, et al. Viral  
484 suppression and retention in care up to 5 years after initiation of lifelong art during  
485 pregnancy (option b+) in rural Uganda. *J Acquir Immune Defic Syndr*.  
486 2017;74(3):279–84.
- 487 27. Hosseinipour M, Nelson JAE, Trapence C, Rutstein SE, Kasende F, Kayoyo V, et al.  
488 Viral suppression and HIV drug resistance at 6 months among women in Malawi’s  
489 option B+ program: Results from the PURE Malawi study. *J Acquir Immune Defic*  
490 *Syndr*. 2017;75(2):S149–55.
- 491 28. Nyakura J, Shewade HD, Ade S, Mushavi A, Mukungunugwa SH, Chimwaza A, et al.  
492 Viral load testing among women on ‘option B+’ in Mazowe, Zimbabwe: How well are  
493 we doing? *PLoS One*. 2019;14(12):1–14.
- 494 29. Chagomerana MB, Edwards JK, Zalla LC, Carbone NB, Banda GT, Mofolo IA, et al.  
495 Timing of HIV testing among pregnant and breastfeeding women and risk of mother-

- 496 to-child HIV transmission in Malawi: a sampling-based cohort study. *J Int AIDS Soc.*  
497 2021;24(3):e25687.
- 498 30. Chohan BH, Ronen K, Khasimwa B, Matemo D, Osborn L, Unger JA, Drake AL, Beck  
499 IA, Frenkel LM, Kinuthia J, John-Stewart G. Food insecurity, drug resistance and non-  
500 disclosure are associated with virologic non-suppression among HIV pregnant women  
501 on antiretroviral treatment. *PloS one.* 2021;16(8):e0256249.
- 502 31. Myer L, Essajee S, Broyles LN, Watts DH, Lesosky M, El-Sadr WM, et al. Pregnant  
503 and breastfeeding women: A priority population for HIV viral load monitoring. *PLoS*  
504 *Med.* 2017;14(8):1–7.
- 505 32. Duri K, Mataramvura H, Chandiwana P, Mazhandu AJ. Mother-to-Child Transmission  
506 of HIV Within 24 Months After Delivery in Women Initiating Lifelong Antiretroviral  
507 Therapy Pre / Post-Conception or Postnatally ; Effects of Adolescent Girl and Young  
508 Woman Status and Plasma Viremia Late in Pregnancy. *Front Virol.* 2022;2(906271).  
509 10.3389/fviro.2022.906271.
- 510 33. Gordon TP, Talbert M, Mugisha MK, Herbert AE. Factors associated with HIV viral  
511 suppression among adolescents in Kabale district, South Western Uganda. *Plos one.*  
512 2022;17(8):e0270855.
- 513 34. Erjino E, Abera ELTD. Time to Viral Load Suppression and Its Predictors Among  
514 Adult Patients on Antiretro Viral Therapy in Nigist Eleni Mohammed Memorial  
515 Comprehensive. *HIV/AIDS - Res Palliat Care.* 2023;15  
516 (<https://doi.org/10.2147/HIV.S408565>):157–71.
- 517 35. Napyo A, Tumwine JK, Mukunya D, Tumuhamyé J, Arach AAO, Ndeezi G, et al.  
518 Detectable HIV-RNA Viral Load Among HIV-Infected Pregnant Women on Treatment  
519 in Northern Uganda. *Int J Matern Child Heal AIDS.* 2020;9(2):232–41.

- 520 36. Ajao KO, Ojofeitimi EO, Adebayo AA, Fatusi AO, Afolabi OT. Influence of family  
521 size, household food security status, and child care practices on the nutritional status of  
522 under-five children in Ile-Ife, Nigeria. African journal of reproductive health.  
523 2010;14(4).
- 524 37. Atuhaire P, Matovu F, Nakalega R, Kataike H, Nabwana M, Lukyamuzi Z, Guwattude  
525 D. Time to first viral load testing among pregnant women living with HIV initiated on  
526 option B+ at 5 government clinics in Kampala city, Uganda: Retrospective cohort  
527 study. International Journal of Infectious Diseases. 2021;104:526-31.
- 528 38. Langford SE, Ananworanich J, Cooper DA. AIDS Research and Therapy Predictors  
529 of disease progression in HIV infection : a review. AIDS Res Ther. 2007;4(11).  
530 10.1186/1742-6405-4-11.
- 531  
532  
533  
534  
535  
536  
537  
538  
539  
540  
541  
542  
543  
544  
545  
546



547 **Tables and figures**

548

549 **Tables**

550 **Table 1: Socio-demographic characteristics of HIV-positive receiving *ART* drugs among**  
 551 **pregnant and lactating women.**

| <b>Variables</b>        | <b>Category</b>                 | <b>Frequency</b> | <b>Percent</b> |
|-------------------------|---------------------------------|------------------|----------------|
| Age group               | <30 years                       | 265              | 53.4           |
|                         | >=30 years                      | 231              | 46.6           |
| Educational status      | No formal education             | 81               | 16.3           |
|                         | Primary School                  | 188              | 37.9           |
|                         | Secondary School                | 153              | 30.8           |
|                         | College/ University             | 74               | 14.9           |
| Marital Status          | Divorced                        | 29               | 5.8            |
|                         | Widowed                         | 9                | 1.8            |
|                         | Married                         | 427              | 86.1           |
|                         | Single                          | 31               | 6.3            |
| Religious Belief        | Orthodox Christian              | 384              | 77.4           |
|                         | Protestant                      | 44               | 8.9            |
|                         | Muslim                          | 62               | 12.5           |
|                         | Others                          | 6                | 1.2            |
| Occupational Status     | Government and private employee | 144              | 29.0           |
|                         | Housewife                       | 273              | 55.0           |
|                         | Merchant                        | 31               | 6.3            |
|                         | Unemployed                      | 36               | 7.3            |
|                         | Others                          | 12               | 2.4            |
| Type of health facility | Health Centre                   | 332              | 66.9           |
|                         | Hospital                        | 164              | 33.1           |
| Family size             | 1-2                             | 78               | 15.7           |
|                         | 3-4                             | 285              | 57.5           |
|                         | > 4                             | 133              | 26.8           |

552

553

554

555

556

557 **Table 2: Clinical and Behavioural characteristics of PMICT Mothers**

| <b>Variables</b>                             | <b>Category</b>      | <b>Frequency</b> | <b>Percent</b> |
|----------------------------------------------|----------------------|------------------|----------------|
| Partner’s HIV status                         | Negative             | 138              | 27.8           |
|                                              | Positive             | 244              | 49.2           |
|                                              | Unknown              | 114              | 23.0           |
| Receiving regular supplies of ART            | No                   | 41               | 8.3            |
|                                              | Yes                  | 455              | 91.7           |
| Level of Adherence                           | Poor                 | 11               | 2.2            |
|                                              | Fair                 | 20               | 4.0            |
|                                              | Good                 | 465              | 93.8           |
| Opportunistic infection exposed              | No                   | 461              | 92.9           |
|                                              | Yes                  | 35               | 7.1            |
| WHO clinical stage                           | Stage III            | 11               | 2.2            |
|                                              | Stage II             | 24               | 4.8            |
|                                              | Stage I              | 461              | 92.9           |
| Alcohol /substance use in the last one month | No                   | 443              | 89.3           |
|                                              | Yes                  | 53               | 10.7           |
| HIV status disclosure other than HCWs        | No                   | 133              | 26.8           |
|                                              | Yes                  | 363              | 73.2           |
| The habit of using a memory aid              | No                   | 192              | 38.7           |
|                                              | Yes                  | 304              | 61.3           |
| Previous ART regimen (n=356)                 | 1B                   | 2                | 0.6            |
|                                              | 1C (AZT + 3TC + NVP) | 34               | 9.6            |
|                                              | 1E (TDF + 3TC + EFV) | 320              | 89.9           |
| ART duration                                 | 6-11 months          | 53               | 10.7           |
|                                              | 1 to 5 years         | 175              | 35.3           |
|                                              | 5 to 10 years        | 165              | 33.3           |
|                                              | more than 10 years   | 103              | 20.8           |

558  
559  
560  
561  
562  
563  
564  
565  
566  
567  
568  
569  
570

571 **Table 3: Obstetrics characteristics of PMTCT Mothers**

| Variables                                   | Category         | Frequency | Percent |
|---------------------------------------------|------------------|-----------|---------|
| Type of participants                        | Pregnant         | 176       | 35.5    |
|                                             | Lactating        | 320       | 64.5    |
| Gestational Age (n=176)                     | First Trimester  | 11        | 6.3     |
|                                             | Second Trimester | 81        | 46.0    |
|                                             | Third Trimester  | 84        | 47.7    |
| Gravidity                                   | Primigravida     | 194       | 39.1    |
|                                             | Multigravida     | 302       | 60.9    |
| Parity                                      | 0-1 child        | 362       | 73.0    |
|                                             | >=2 child        | 134       | 27.0    |
| Chronic Illness (at the time of the survey) | No               | 487       | 98.2    |
|                                             | Yes              | 9         | 1.8     |
| MUAC                                        | <23 cm           | 23        | 4.6     |
|                                             | >=23 cm          | 473       | 95.4    |
| CD4 (time of survey)                        | <350 cells/ul    | 33        | 6.7     |
|                                             | >=350            | 463       | 93.3    |
| Syphilis Antibody test                      | Positive         | 14        | 2.8     |
|                                             | Negative         | 482       | 97.2    |

572

573

574 **Table 4: Chi-square analysis of factors associated with HIV-1 viral non-suppression**  
 575 **among PMTCT Mothers.**

| Variables               | Category                        | Viral non-suppressed N (%) | Viral suppressed N (%) | Chi-square (X <sup>2</sup> ) | P- value |
|-------------------------|---------------------------------|----------------------------|------------------------|------------------------------|----------|
| Type of health facility | Health Centre                   | 6 (1.8)                    | 326 (98.2)             | 0.780                        | 0.377    |
|                         | Hospital                        | 5 (3.0)                    | 159 (97.0)             |                              |          |
| Age                     | <30 years                       | 4 (1.5)                    | 261 (98.5)             | 1.316                        | 0.251    |
|                         | >=30 years                      | 7 (3.0)                    | 224 (97.0)             |                              |          |
| Educational status      | No formal education             | 4 (4.9)                    | 77 (95.1)              | 3.765                        | 0.288    |
|                         | Primary School                  | 3 (1.6)                    | 185 (98.4)             |                              |          |
|                         | Secondary School                | 2 (1.3)                    | 151 (98.7)             |                              |          |
|                         | College/ University             | 2 (2.7)                    | 72 (97.3)              |                              |          |
| Marital Status          | Divorced                        | 2 (6.9)                    | 27 (93.1)              | 3.510                        | 0.319    |
|                         | Widowed                         | 0 (0.0)                    | 9 (100.0)              |                              |          |
|                         | Married                         | 8 (1.9)                    | 419 (98.1)             |                              |          |
|                         | Single                          | 1(3.2)                     | 30 (96.8)              |                              |          |
| Religious Belief        | Orthodox Christian              | 9 (2.3)                    | 375 (97.7)             | 0.269                        | 0.966    |
|                         | Protestant                      | 1 (2.3)                    | 43 (97.7)              |                              |          |
|                         | Muslim                          | 1 (1.6)                    | 61 (98.4)              |                              |          |
|                         | Others                          | 0 (0.0)                    | 6 (100.0)              |                              |          |
| Occupational Status     | Government and private employee | 3 (2.1)                    | 141 (97.9)             | 5.409                        | 0.248    |
|                         | Housewife                       | 4 (1.5)                    | 269 (98.5)             |                              |          |
|                         | Merchant                        | 2 (6.5)                    | 29 (93.5)              |                              |          |

|                                             |                      |          |            |        |         |
|---------------------------------------------|----------------------|----------|------------|--------|---------|
|                                             | Unemployed           | 1 (2.8)  | 35 (97.2)  |        |         |
|                                             | Others               | 1 (8.3)  | 11 (91.7)  |        |         |
| Family Size                                 | 1-2                  | 3 (3.8)  | 75 (96.2)  | 7.200  | 0.027*  |
|                                             | 3-4                  | 2 (0.7)  | 283 (99.3) |        |         |
|                                             | > 4                  | 6 (4.5)  | 127 (95.5) |        |         |
| Partner's HIV Status                        | Negative             | 5 (3.6)  | 133 (96.4) | 4.332  | 0.115   |
|                                             | Positive             | 2 (0.8)  | 242 (99.2) |        |         |
|                                             | Unknown              | 4 (3.5)  | 110 (96.5) |        |         |
| Receiving regular supplies of ART           | No                   | 2 (4.9)  | 39 (95.1)  | 1.459  | 0.227   |
|                                             | Yes                  | 9 (2.0)  | 446 (98.0) |        |         |
| Level of Adherence                          | Poor                 | 1(9.1)   | 10 (90.9)  | 18.553 | <0.001* |
|                                             | Fair                 | 3 (15.0) | 17 (85.0)  |        |         |
|                                             | Good                 | 7 (1.5)  | 458 (98.5) |        |         |
| Opportunistic infection                     | Yes                  | 5 (14.3) | 30 (85.7)  | 25.290 | <0.001* |
|                                             | No                   | 6 (1.3)  | 455 (98.7) |        |         |
| WHO clinical stage                          | Stage II & III       | 5 (14.3) | 30 (85.7)  | 25.290 | <0.001* |
|                                             | Stage I              | 6 (1.3)  | 455 (98.7) |        |         |
| Alcohol/substance use in the last one month | Yes                  | 3 (5.7)  | 50 (94.3)  | 3.243  | 0.072   |
|                                             | No                   | 8 (1.8)  | 435 (98.2) |        |         |
| HIV status disclosure other than HCWs       | No                   | 6 (4.5)  | 127 (95.5) | 4.408  | 0.036*  |
|                                             | Yes                  | 5 (1.4)  | 358 (98.6) |        |         |
| The habit of using a memory aid             | No                   | 5 (2.6)  | 187 (97.4) | 0.216  | 0.642   |
|                                             | Yes                  | 6 (2.0)  | 298 (98.0) |        |         |
| Previous ART regimen                        | 1B                   | 0 (0.0)  | 2 (100.0)  | 2.173  | 0.537   |
|                                             | 1C (AZT + 3TC + NVP) | 0 (0.0)  | 34 (100.0) |        |         |
|                                             | 1E (TDF + 3TC + EFV) | 6 (1.9)  | 314 (98.1) |        |         |
| ART duration                                | 6-11 months          | 2 (3.8)  | 51 (96.2)  | 0.753  | 0.861   |
|                                             | 1 to 5 years         | 4 (2.3)  | 171 (97.7) |        |         |
|                                             | 5 to 10 years        | 3 (1.8)  | 162 (98.2) |        |         |
|                                             | more than 10 years   | 2 (1.9)  | 101 (98.1) |        |         |
| Type of participants                        | Pregnant             | 4 (2.3)  | 172 (97.7) | 0.004  | 0.951   |
|                                             | Lactating            | 7 (2.2)  | 313 (97.8) |        |         |
| Gestational Age (n=176)                     | First Trimester      | 0 (0.0)  | 11 (100.0) | 4.483  | 0.106   |
|                                             | Second Trimester     | 0 (0.0)  | 81 (100.0) |        |         |
|                                             | Third Trimester      | 4 (4.8)  | 80 (95.2)  |        |         |
| Gravidity                                   | Primigravida         | 4 (2.1)  | 190 (97.9) | 0.036  | 0.850   |
|                                             | Multigravida         | 7 (2.3)  | 295 (97.7) |        |         |
| Parity                                      | 0-1 child            | 7 (1.9)  | 355 (98.1) | 0.499  | 0.480   |
|                                             | >=2 child            | 4 (3.0)  | 130 (97.0) |        |         |
| MUAC                                        | <23 cm               | 1 (4.3)  | 22 (95.7)  | 0.505  | 0.477   |
|                                             | >=23 cm              | 10 (2.1) | 463 (97.9) |        |         |
| CD4                                         | <350 cells/ul        | 4 (12.1) | 29 (87.9)  | 15.989 | <0.001* |
|                                             | >=350                | 7 (1.5)  | 456 (98.5) |        |         |
| Syphilis Antibody test                      | Positive             | 1 (7.1)  | 13 (92.9)  | 1.611  | 0.204   |
|                                             | Negative             | 10 (2.1) | 472 (97.9) |        |         |

576 \*indicates p-value less than <0.05

577

578

579

580 **Table 5: Mann-Whitney U analysis of quantitative variables distribution among**  
 581 **PMTCT Mothers**

| Quantitative variables                  | HIV-1 Viral Non-suppressed (N=11) | HIV-1 Viral Suppressed (N=485) | P- value |
|-----------------------------------------|-----------------------------------|--------------------------------|----------|
| Age, Median (IQR)                       | 35 (30, 37)                       | 30 (27, 35)                    | 0.075    |
| Duration on ART in months, Median (IQR) | 60 (15.5, 120)                    | 72 (28, 120)                   | 0.696    |
| MUAC measurement in cm, Median (IQR)    | 25 (23, 25.53)                    | 25 (24, 26)                    | 0.396    |
| CD4 T cell in cells/ul, Median (IQR)    | 548 (278, 555)                    | 555 (542, 563)                 | 0.013*   |
| Heamoglobin in g/dl, Median (IQR)       | 12.87 (12.2, 12.92)               | 12.88 (12.2, 13.5)             | 0.408    |

\*indicates the significance level <0.05

582  
583  
584  
585  
586  
587  
588  
589  
590  
591  
592  
593  
594  
595  
596  
597  
598  
599  
600  
601  
602

603 **Figures**

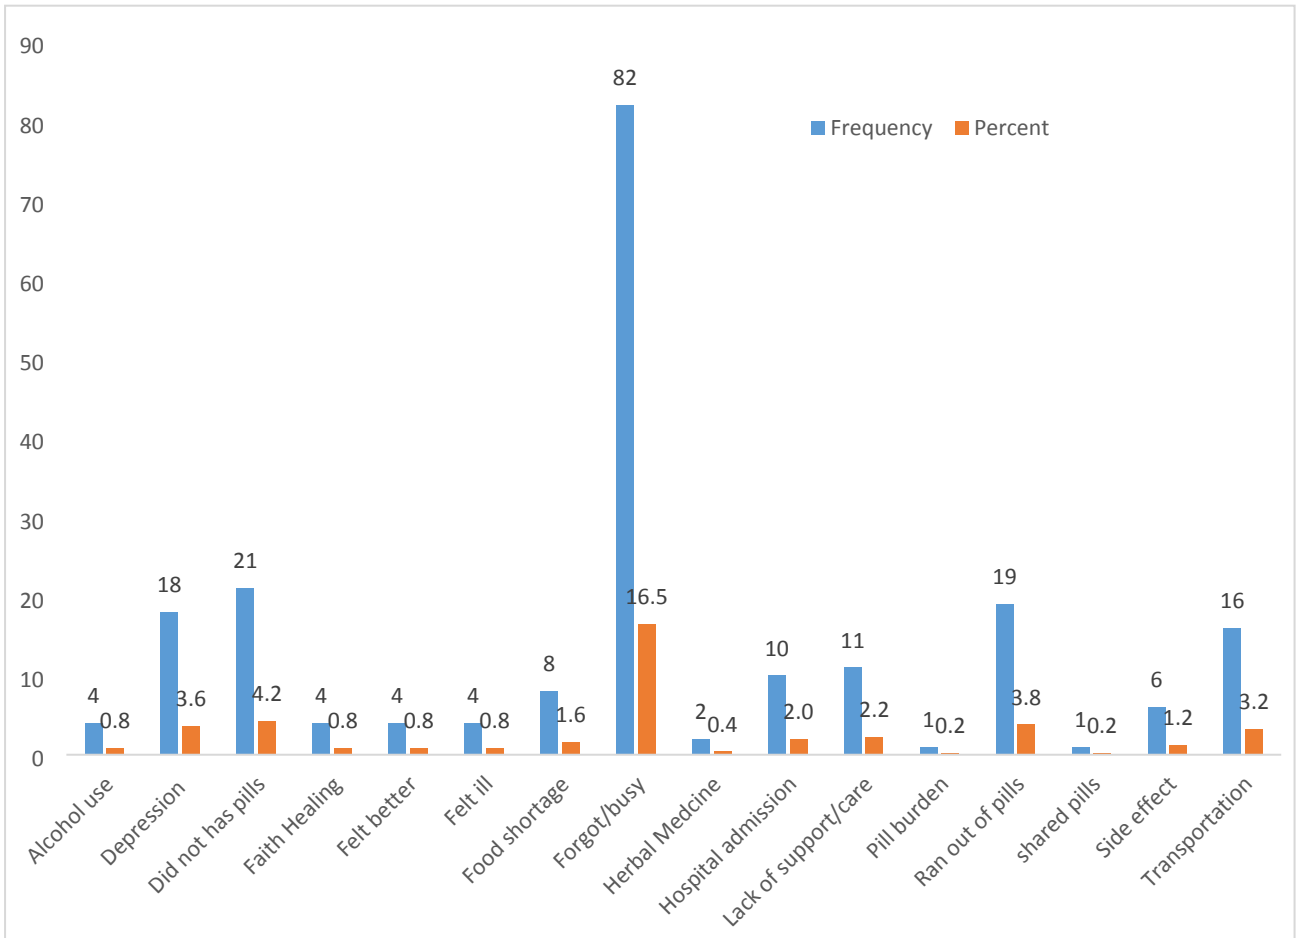

604  
605  
606  
607  
608

**Figure 1: Proportion of participant's reason to stop/skip ART drugs within the last 6 months (n=211)**

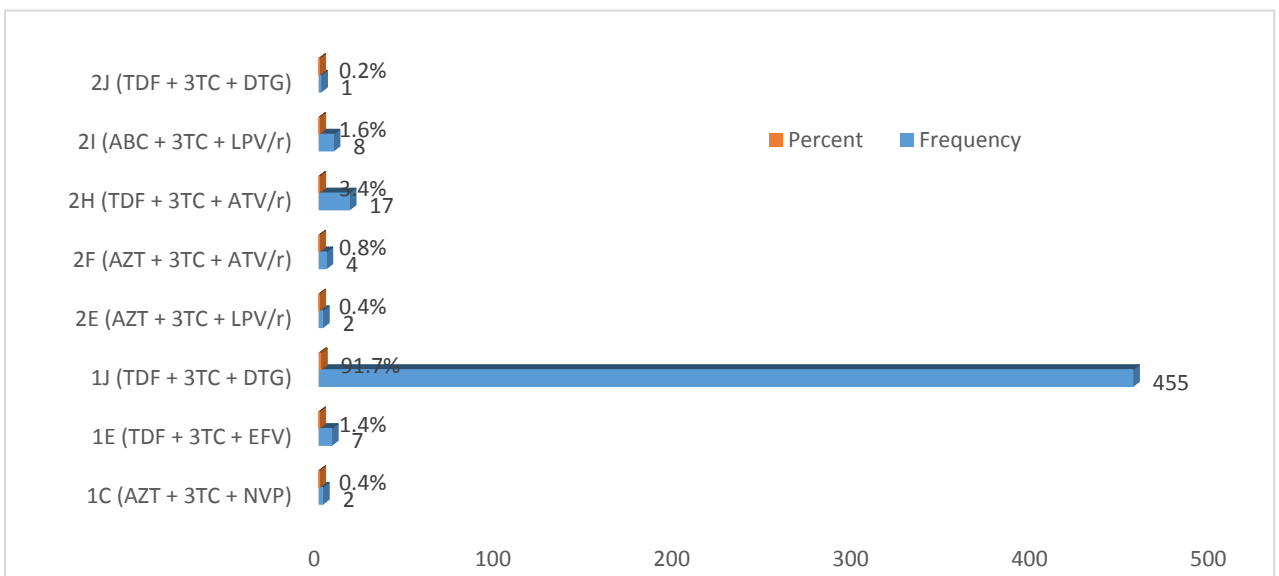

609  
610

**Figure 2: Proportions of ART drug regimen usage among PMTCT Mothers**

611

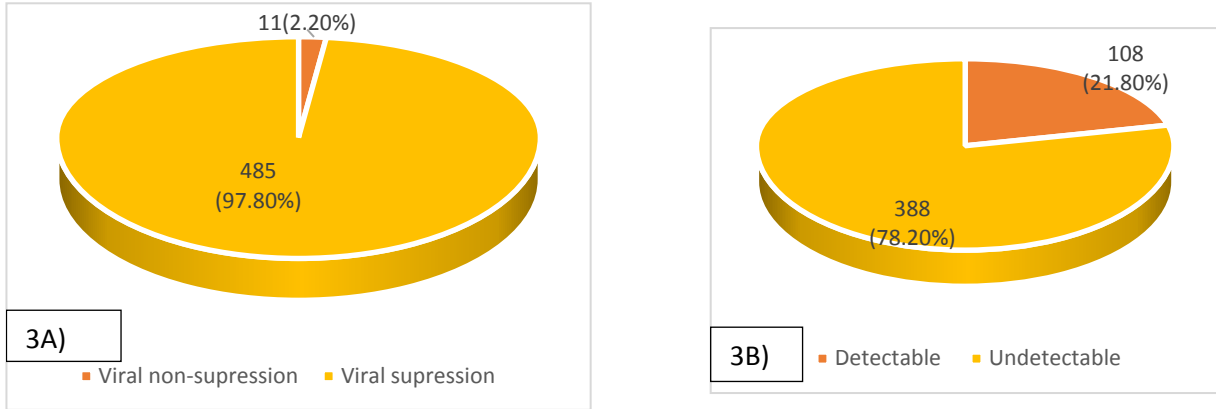

612

613 **Figure 3: Magnitude of HIV-1 non-suppression and Viral detectability among PMTCT**  
 614 **Mothers**

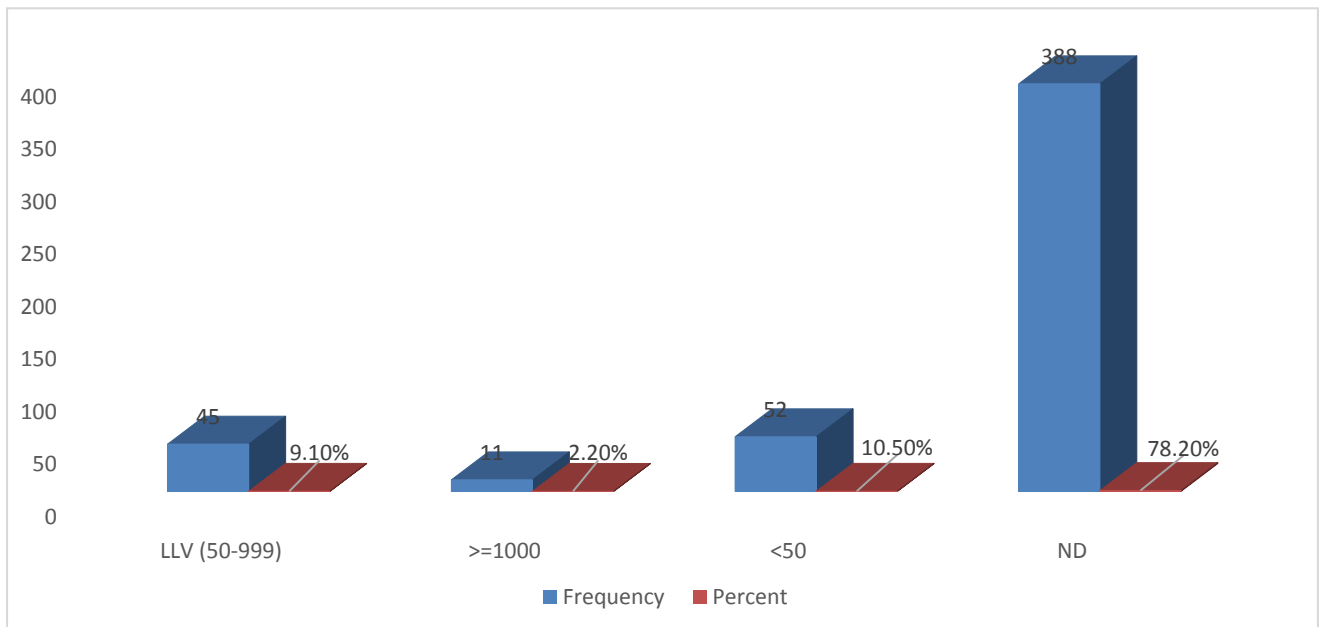

615

616 *LLV: low-level viremia, ND: non-detectable*

617 **Figure 4: Distribution of low-level viremia, viral non-suppression and viral detectability**  
 618 **among PMTCT Mothers**

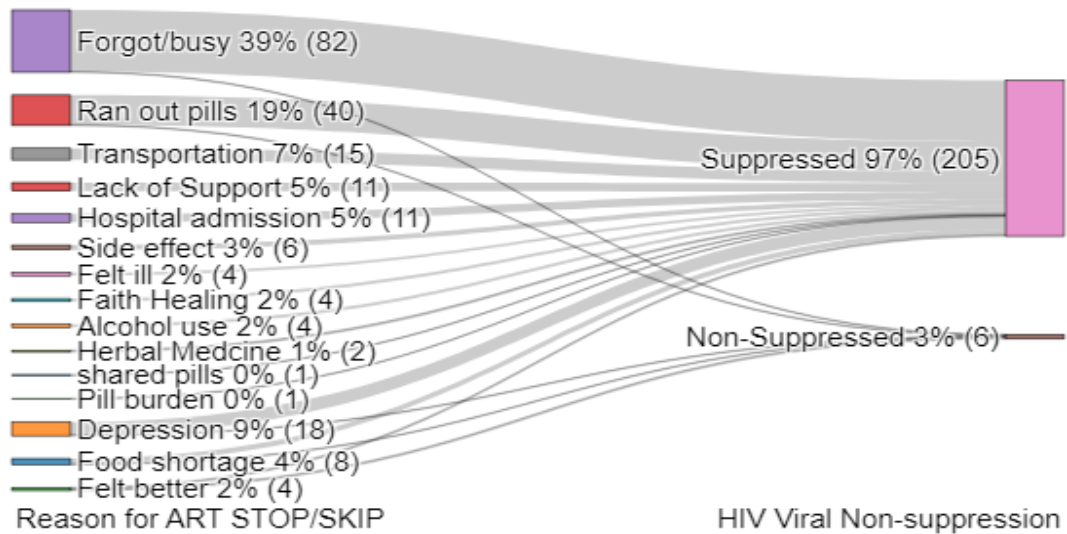

619

620 **Figure 5: Sunkey diagram of the reason for SKIP/Missed ART drugs and distribution**  
 621 **of viral non-suppression among PMTCT Mothers.**

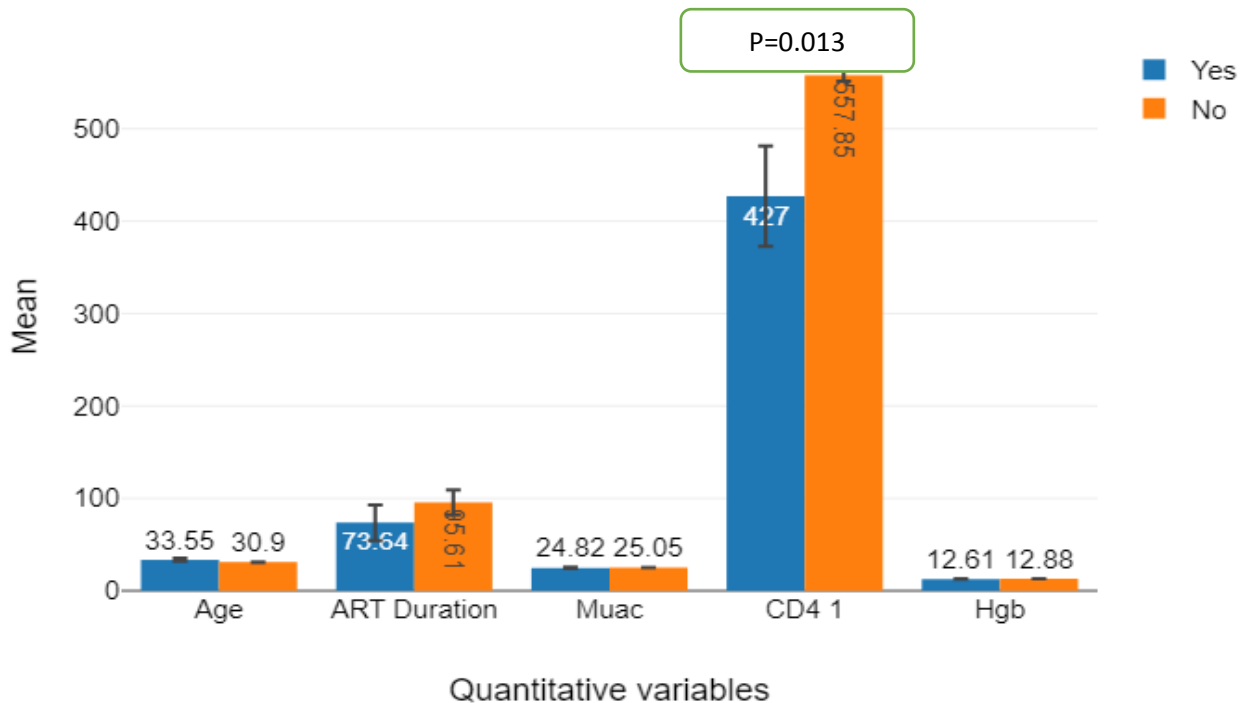

622

623 *MUAC: Middle upper circumference, CD4: Cluster cell differentiation, Hgb: Haemoglobin*

624 **Figure 6: Mean distributions of Quantitative variables in non-suppressed and**  
 625 **suppressed PMTCT Mothers**
